# Supplementary material for: An anticounterfeiting technology combining an InP nanoparticle ink and a versatile optical device for authentication
Source: Royal Society of Chemistry journal article supplement (doi:10.1039/d1ma00383f), 2021-01-01
Supplement: d1ma00383f1.pdf [file d1ma00383f1.pdf]

**Supporting Information**  
**of**  
**An Anticounterfeiting Technology Combining**  
**InP Nanoparticle Ink and Versatile Optical**  
**Device for Authentication**

*Didem Taşcıoğlu<sup>†‡</sup>, Seçil Sevim Ünlütürk<sup>§</sup>, Serdar Özçelik<sup>\*§</sup>*

<sup>†</sup> Department of Material Science and Engineering, Izmir Institute of Technology, Urla, 35430, İzmir, Turkey

<sup>‡</sup> Quantag Nanotechnologies, R&D Lab Budotek Teknopark Dudullu OSB Ümraniye, 34776, İstanbul, Turkey

<sup>§</sup> Department of Chemistry, Izmir Institute of Technology, Urla, 35430, İzmir, Turkey

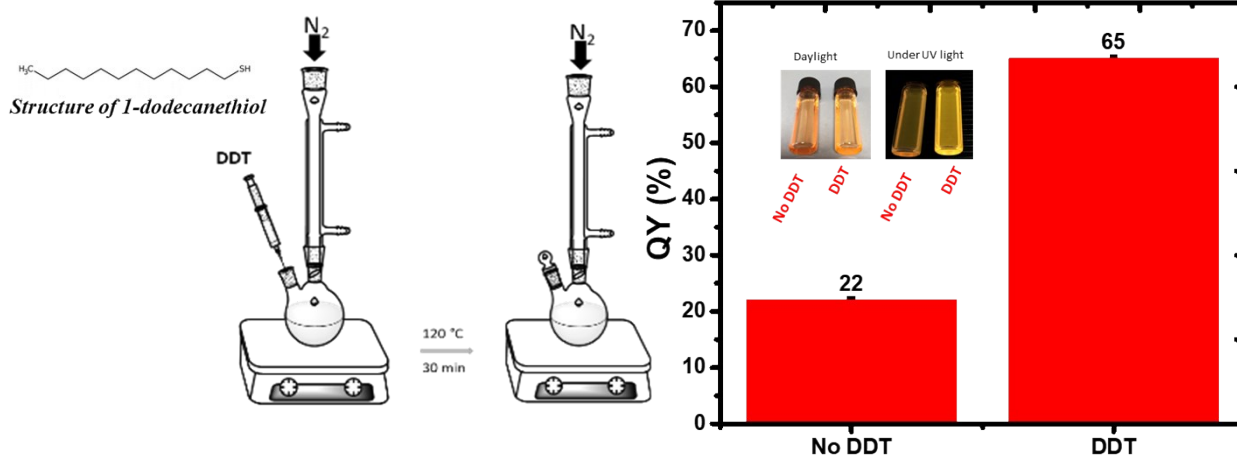

Figure S1. Schematic illustration of synthesis setup of DDT addition and its effect on improving quantum yield.

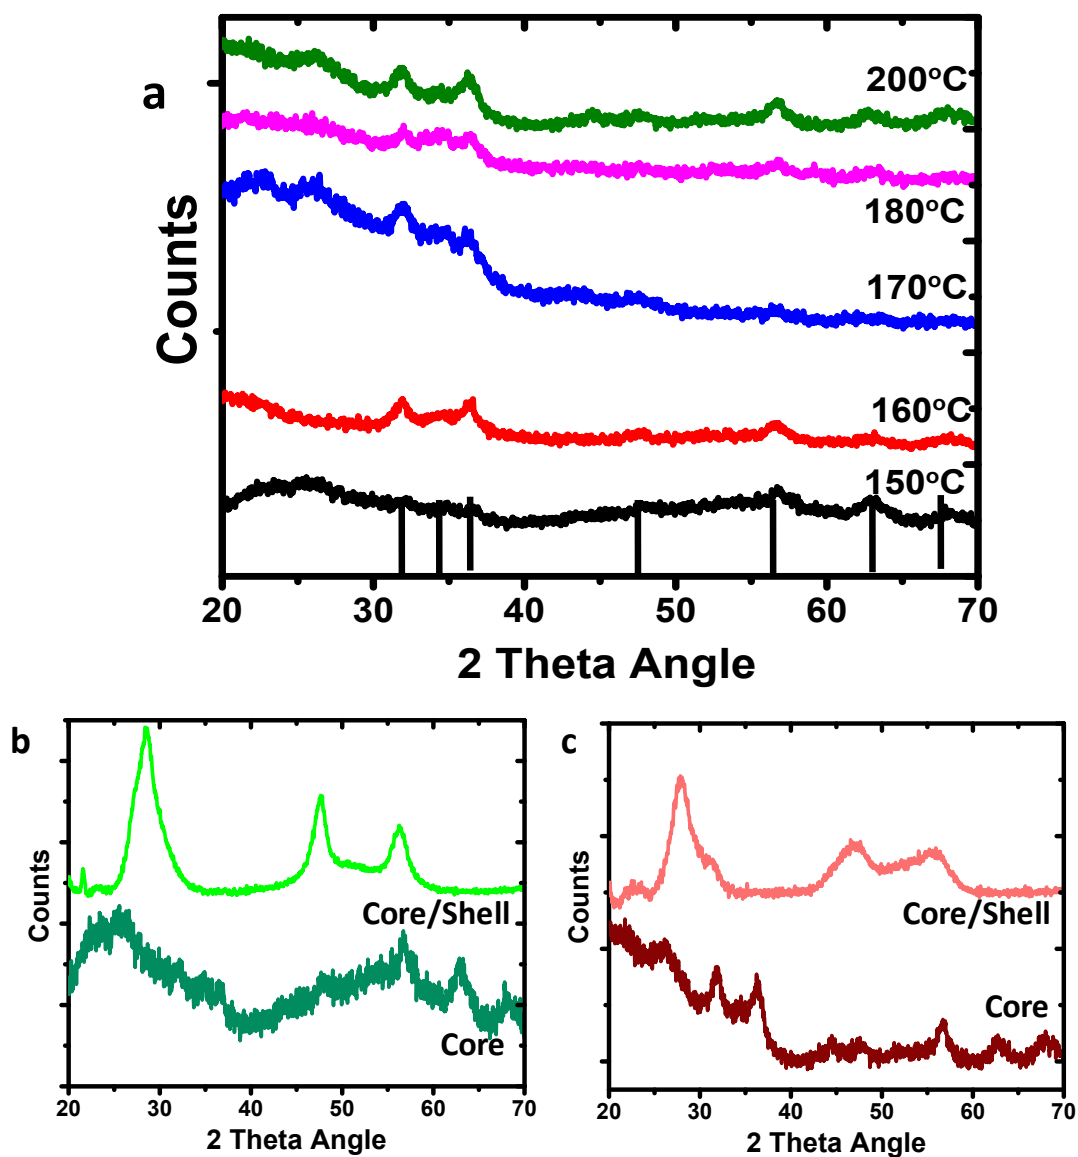

Figure S2. a) The XRD diffractogram of the InZnP core nanoparticles with different core reaction temperatures. The solid black lines represent the reference lines of ZnO structure (JCPDS: 36-1451). The effect of ZnS shell addition on the crystal structure of InZnP/ZnS core/shell nanoparticles was shown for b) 150°C and c) 200°C.

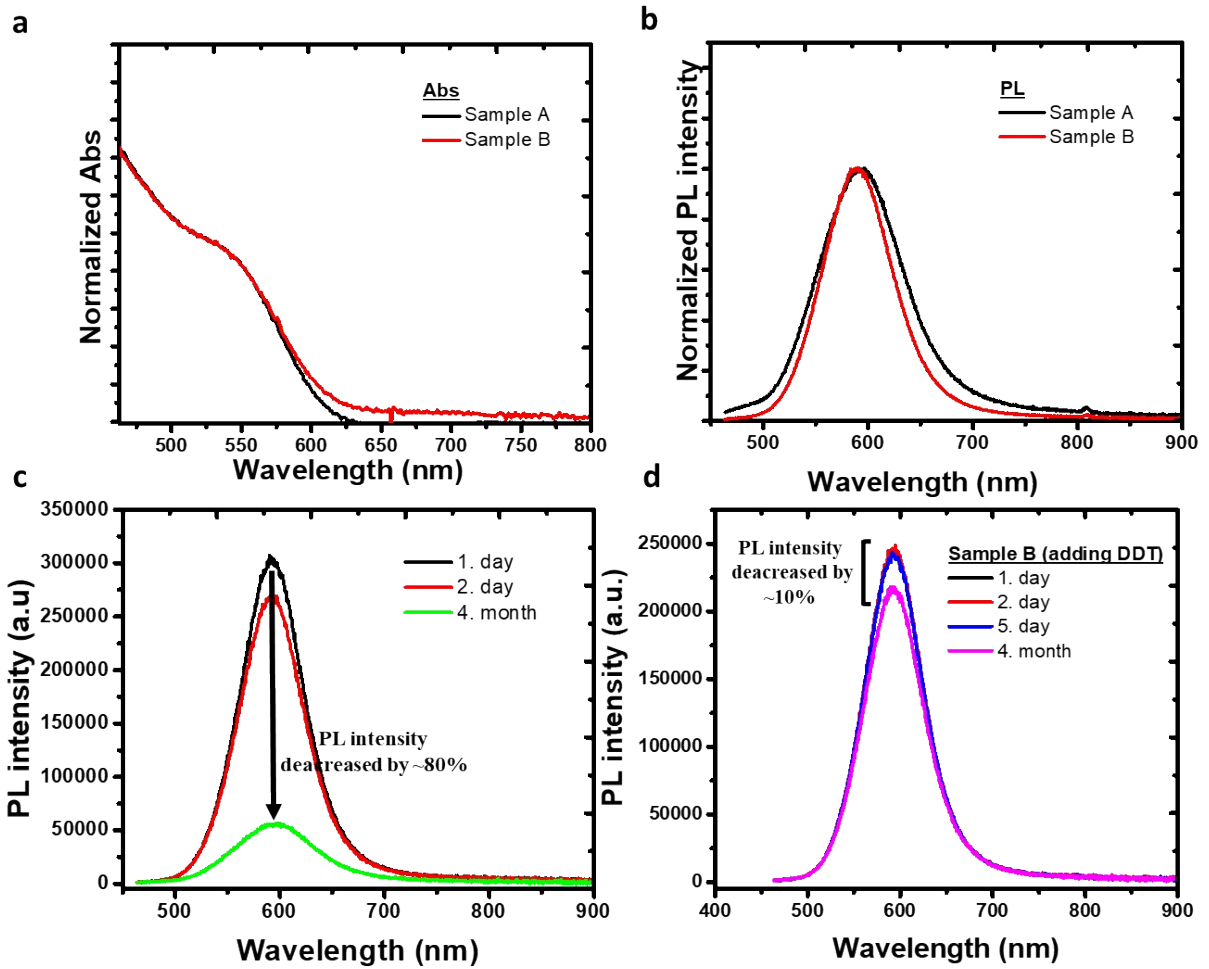

Figure S3. a) Absorption and b) photoluminescence spectra of nanoparticles before and after DDT. Photoluminescence spectra of c) Sample A and d) Sample B at different days.

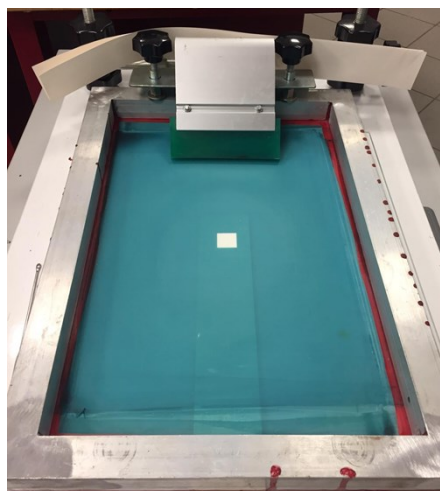

Figure S4. Photograph of the screen printing device.

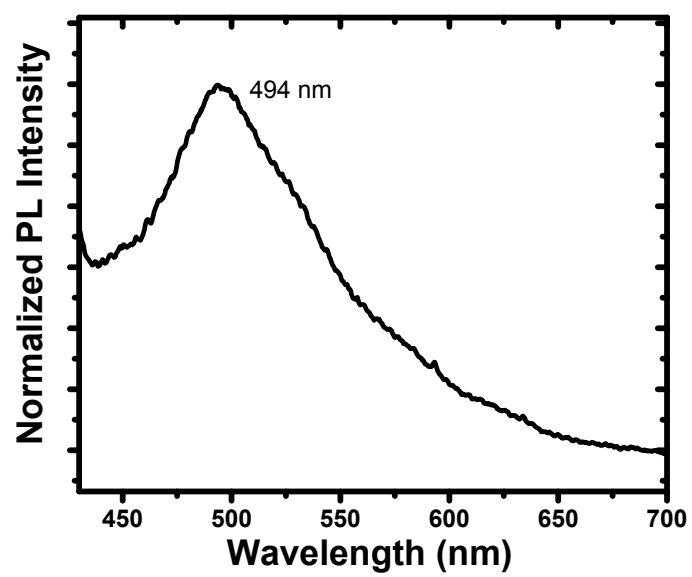

Figure S5. PL spectrum of the commercial varnish used.

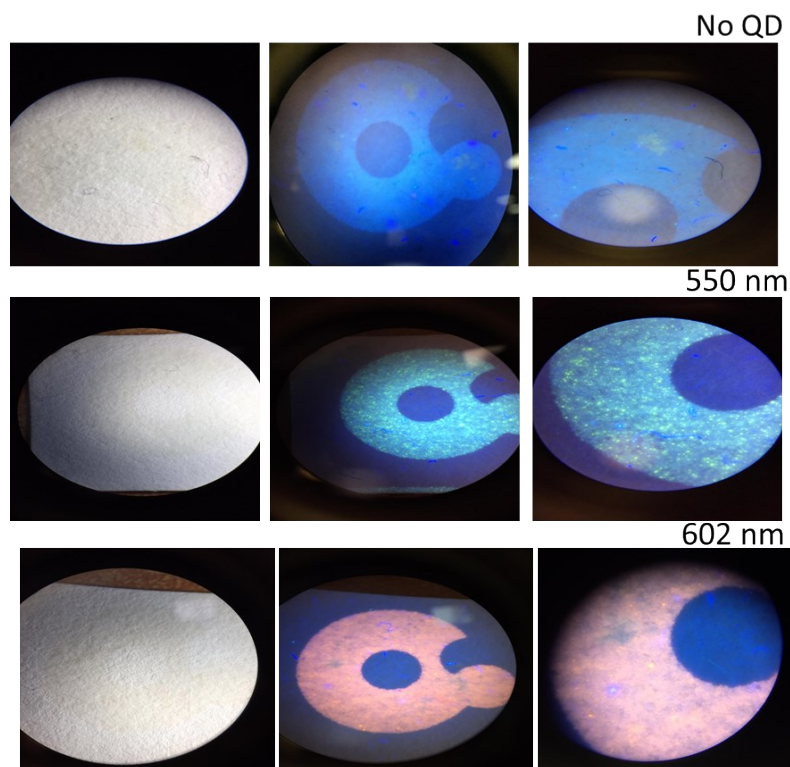

Figure S6. Stereo microscope photographs of the logos printed on papers. Photographs show logos without and with nanoparticles emitting at 550 nm and 602 nm, from the top to the bottom respectively.

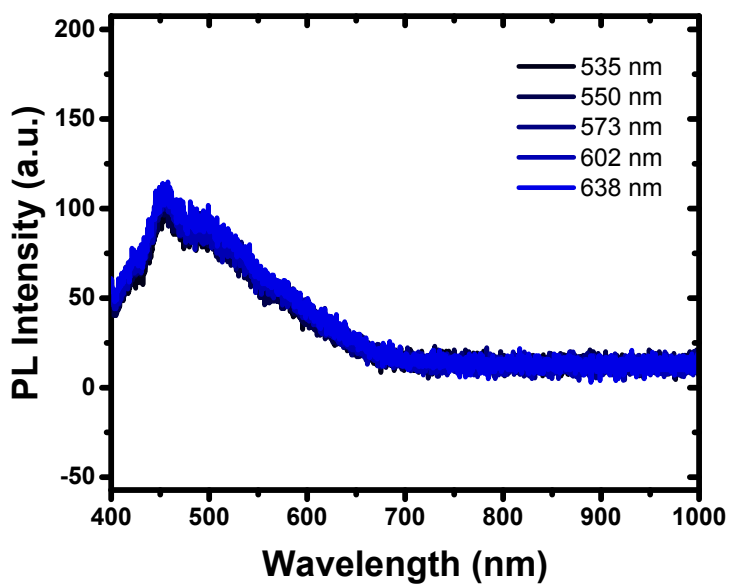

Figure S7. The PL spectra of screen-printed patterns on papers. The QD concentration in the ink was 0.1% (v/v). The labels represent the emission wavelengths of QDs.

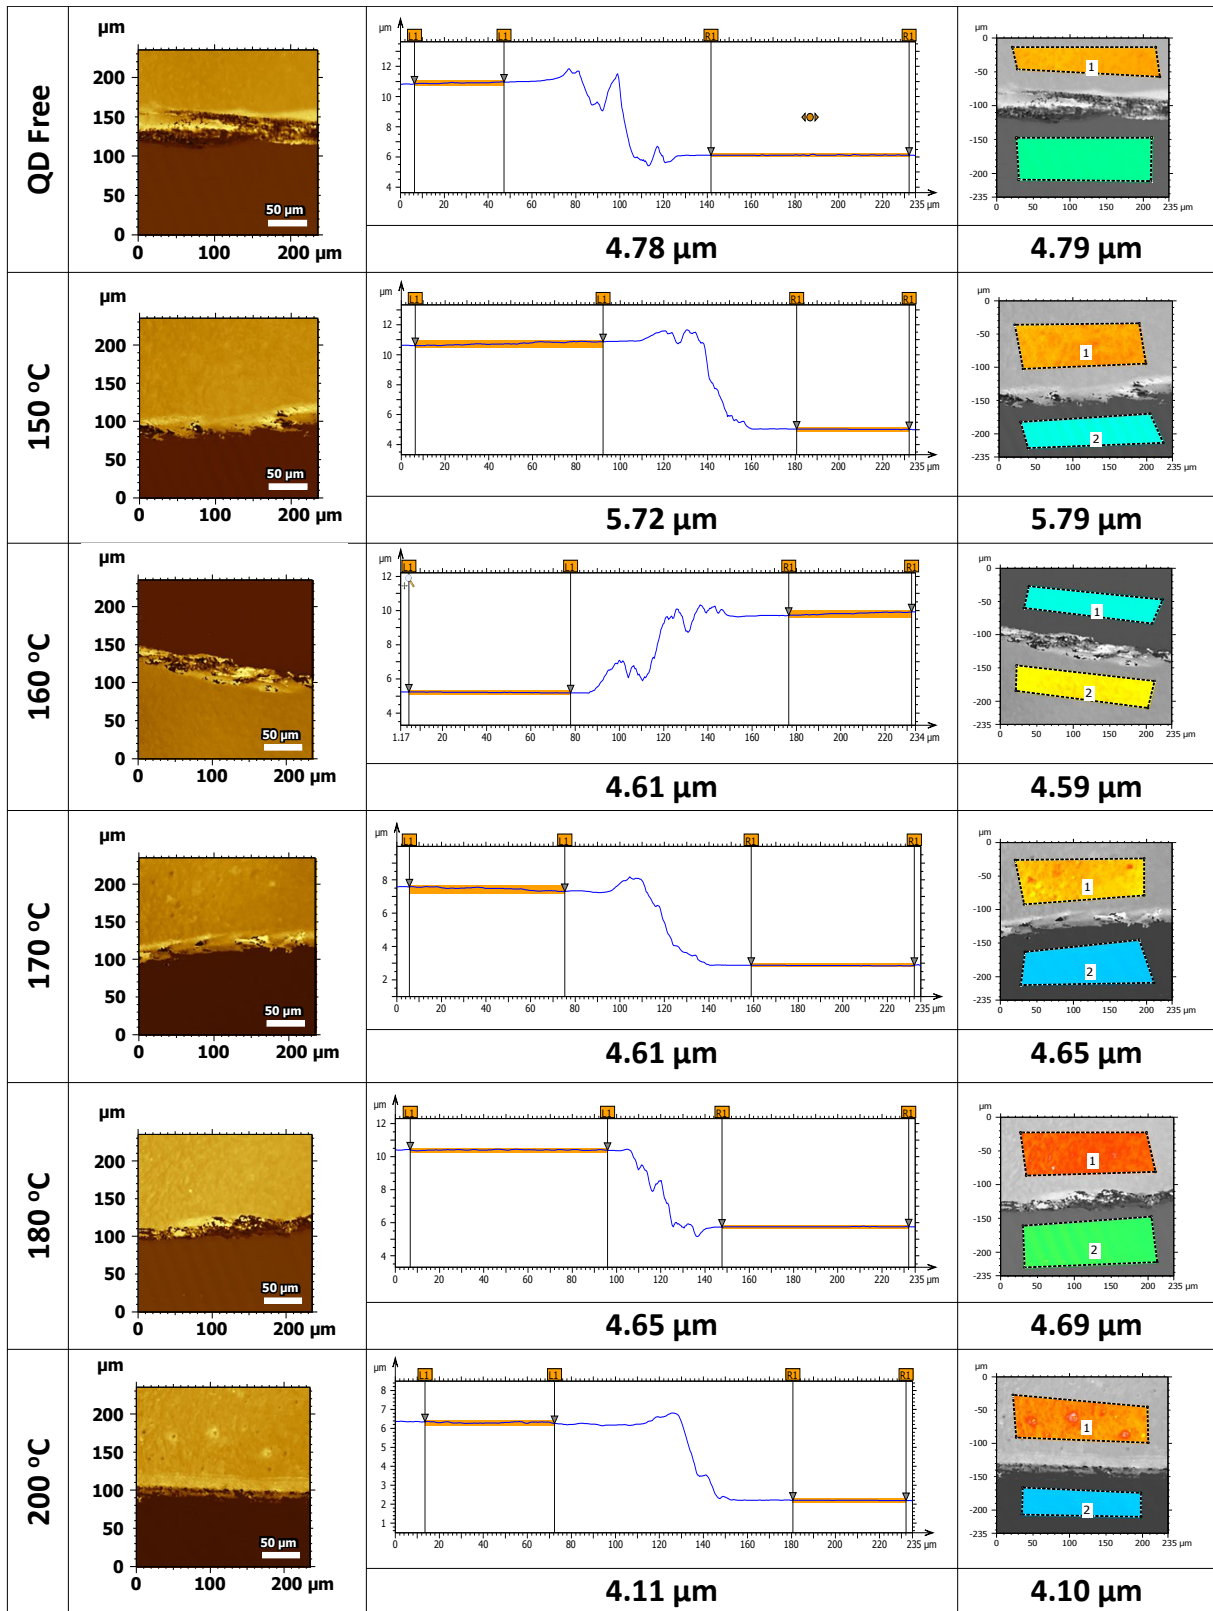

Figure S8. Thickness measurements of screen-printed glass substrates with and without QD incorporation by optical profilometer

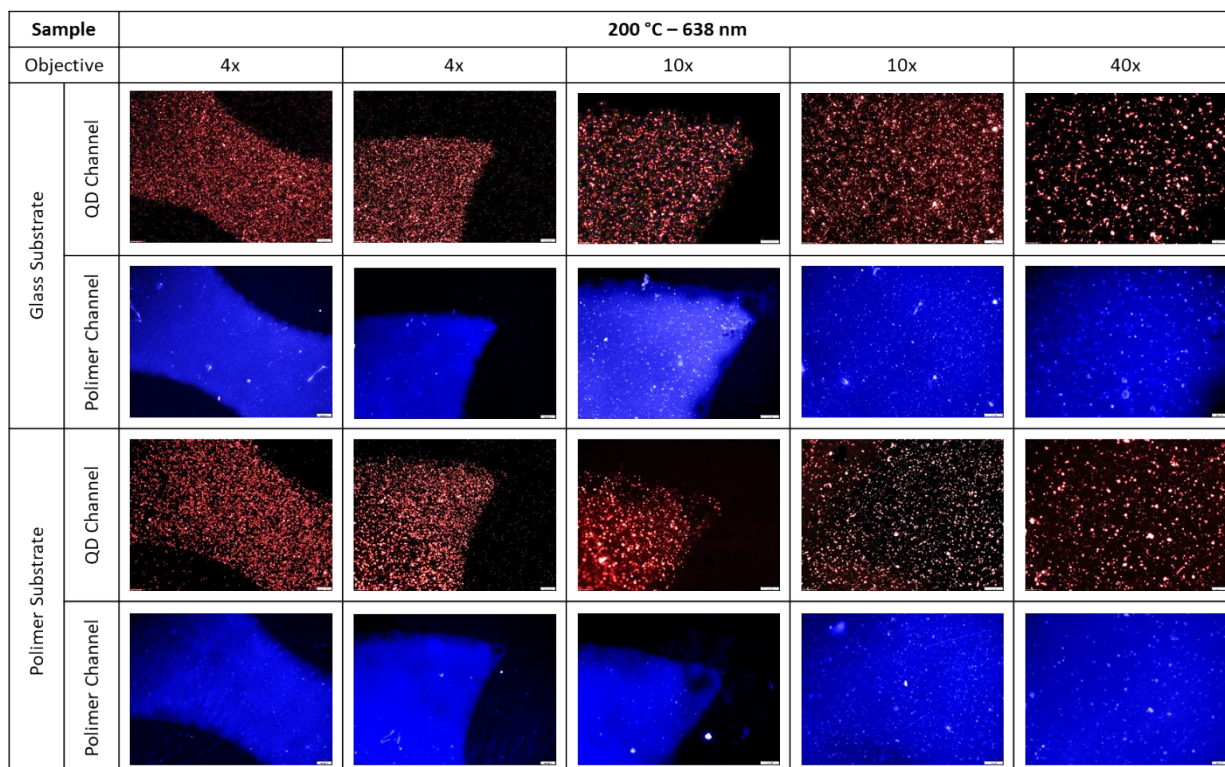

**Figure S9.** Photographs of the part of logo patterns printed with inks containing the red-emitting nanoparticles, emitting at 638 nm on the polymer and glass substrates. The images were taken by a confocal microscope with Hg lamp and red emission filter, using different objectives, to verify the homogenous distribution of nanoparticles.
